# Supplementary material for: Local structural distortions and reduced thermal conductivity in Ge-substituted chalcopyrite
Source: Royal Society of Chemistry journal article supplement (doi:10.1039/d2ta06443j), 2022-01-01
Supplement: d2ta06443j1.pdf [file d2ta06443j1.pdf]

## Electronic Supplementary Information (ESI)

# Local Structural Distortions and Reduced Thermal Conductivity in Ge-Substituted Chalcopyrite

Sahil Tippireddy<sup>1</sup>, Feridoon Azough<sup>2</sup>, Vikram<sup>1</sup>, Animesh Bhui<sup>3</sup>, Philip Chater<sup>4</sup>, Demie  
Kepaptsoglou<sup>5,6</sup>, Quentin Ramasse<sup>5,7</sup>, Robert Freer<sup>2</sup>, Ricardo Grau-Crespo<sup>1</sup>, Kanishka  
Biswas<sup>3</sup>, Paz Vaquero<sup>1</sup>, and Anthony V. Powell<sup>1\*</sup>

<sup>1</sup>*Department of Chemistry, University of Reading, Whiteknights, Reading, RG6 6DX, United  
Kingdom.*

<sup>2</sup>*Department of Materials, University of Manchester, Manchester, M13 9PL, United  
Kingdom.*

<sup>3</sup>*New Chemistry Unit, Jawaharlal Nehru Centre for Advanced Scientific Research, Jakkur,  
Bangalore-560064, India.*

<sup>4</sup>*Diamond Light Source, Harwell Science and Innovation Campus, Didcot OX11 0DE, United  
Kingdom.*

<sup>5</sup>*SuperSTEM Laboratory, SciTech Daresbury Campus, Daresbury WA4 4AD, United  
Kingdom*

<sup>6</sup>*Department of Physics, University of York, York YO10 5DD, United Kingdom*

<sup>7</sup>*School of Chemical and Process Engineering, University of Leeds, Leeds LS2 9JT, United  
Kingdom*

\*Corresponding author: a.v.powell@reading.ac.uk

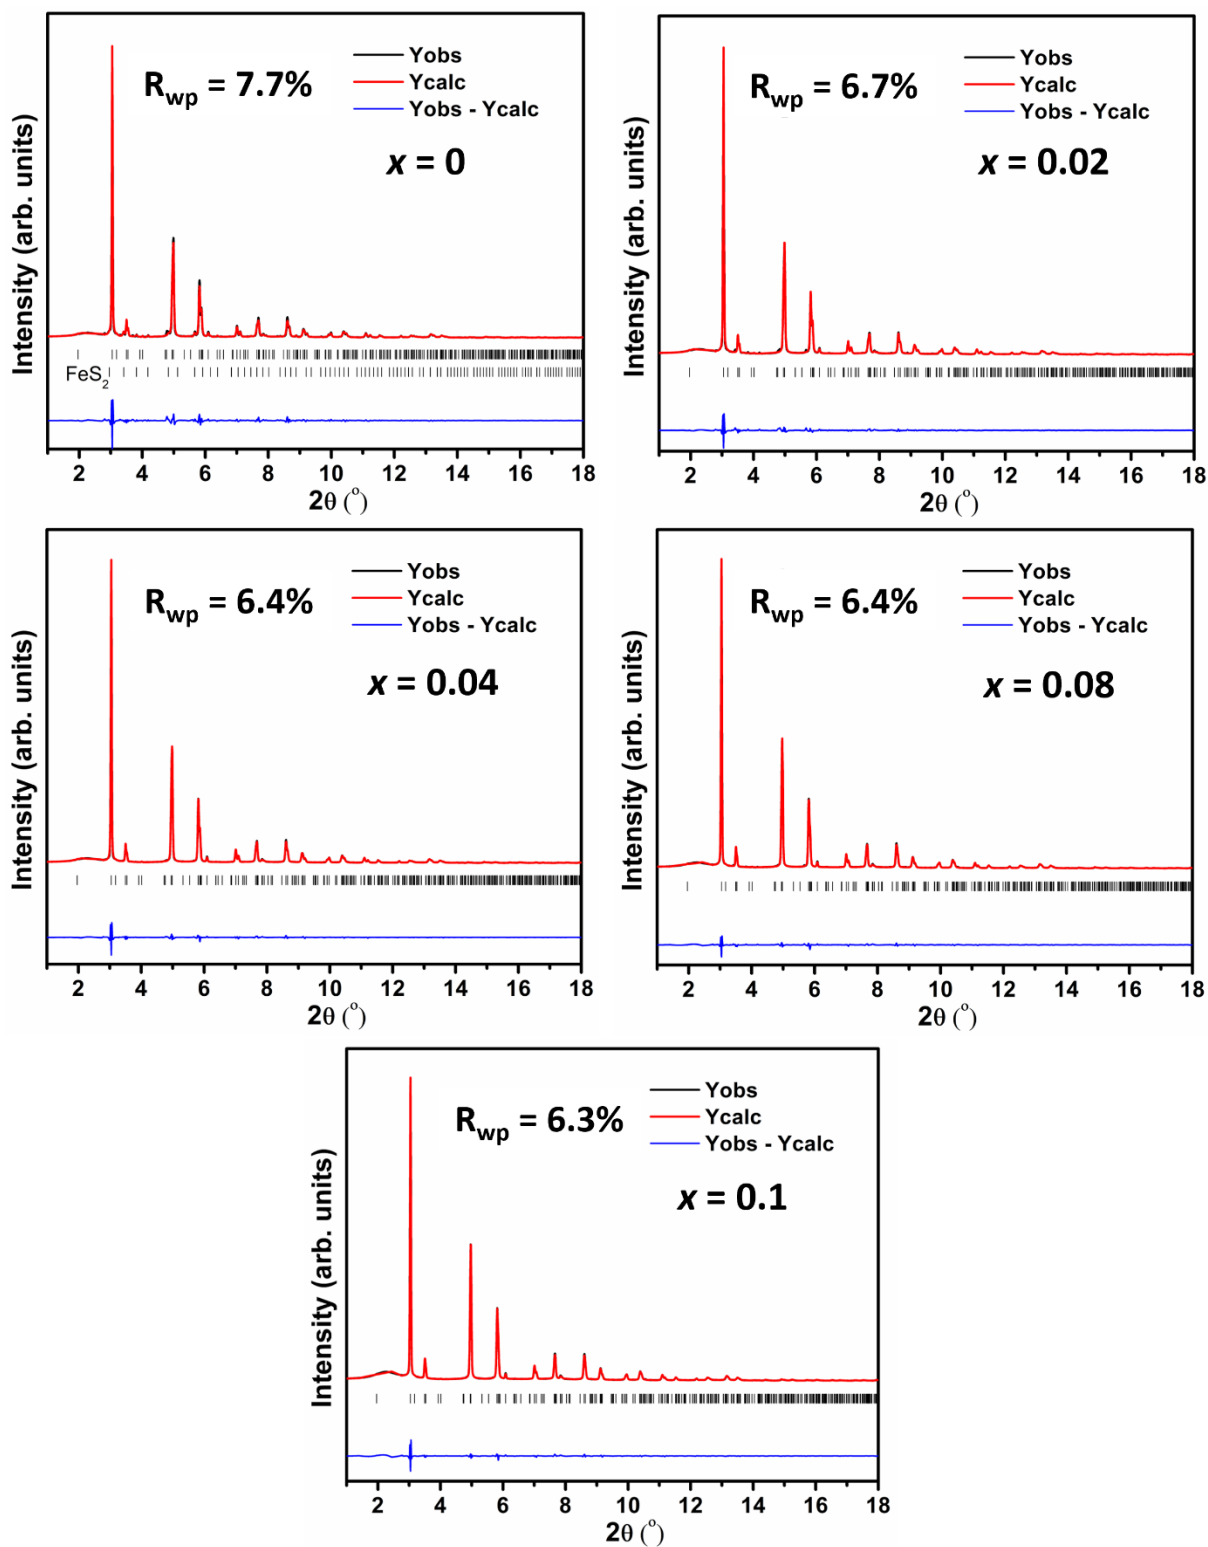

**Figure S1.** Rietveld refinement using synchrotron X-ray powder diffraction data ( $\lambda = 0.161669 \text{ \AA}$ ) for  $\text{CuFe}_{1-x}\text{Ge}_x\text{S}_2$  ( $0 \leq x \leq 0.1$ ).

**Table S1.** Lattice parameters of  $\text{CuFe}_{1-x}\text{Ge}_x\text{S}_2$  ( $0 \leq x \leq 0.1$ ) described in the space group  $I\bar{4}2d$ .

| Sample                                         | $a/\text{\AA}$ | $c/\text{\AA}$ |
|------------------------------------------------|----------------|----------------|
| $\text{CuFeS}_2$                               | 5.2909(3)      | 10.4319(7)     |
| $\text{CuFe}_{0.98}\text{Ge}_{0.02}\text{S}_2$ | 5.2912(2)      | 10.4374(6)     |
| $\text{CuFe}_{0.96}\text{Ge}_{0.04}\text{S}_2$ | 5.2913(2)      | 10.4529(5)     |
| $\text{CuFe}_{0.94}\text{Ge}_{0.06}\text{S}_2$ | 5.2918(2)      | 10.4709(6)     |
| $\text{CuFe}_{0.92}\text{Ge}_{0.08}\text{S}_2$ | 5.2913(2)      | 10.4790(6)     |
| $\text{CuFe}_{0.9}\text{Ge}_{0.1}\text{S}_2$   | 5.2903(3)      | 10.4911(7)     |

**Table S2:** Compositions<sup>#</sup> of the chalcopyrite-type phase determined by EDS.

| Sample (Ge concentration) | Nominal composition                            | EDS composition of the main phase*                                       |
|---------------------------|------------------------------------------------|--------------------------------------------------------------------------|
| $x = 0$                   | $\text{CuFeS}_2$                               | $\text{Cu}_{1.117(9)}\text{Fe}_{1.018(5)}\text{S}_2$                     |
| $x = 0.02$                | $\text{CuFe}_{0.98}\text{Ge}_{0.02}\text{S}_2$ | $\text{Cu}_{1.146(5)}\text{Fe}_{0.984(5)}\text{Ge}_{0.024(3)}\text{S}_2$ |
| $x = 0.04$                | $\text{CuFe}_{0.96}\text{Ge}_{0.04}\text{S}_2$ | $\text{Cu}_{1.146(8)}\text{Fe}_{0.971(9)}\text{Ge}_{0.042(4)}\text{S}_2$ |
| $x = 0.06$                | $\text{CuFe}_{0.94}\text{Ge}_{0.06}\text{S}_2$ | $\text{Cu}_{1.118(4)}\text{Fe}_{0.957(5)}\text{Ge}_{0.062(3)}\text{S}_2$ |
| $x = 0.08$                | $\text{CuFe}_{0.92}\text{Ge}_{0.08}\text{S}_2$ | $\text{Cu}_{1.102(2)}\text{Fe}_{0.936(9)}\text{Ge}_{0.078(3)}\text{S}_2$ |
| $x = 0.1$                 | $\text{CuFe}_{0.9}\text{Ge}_{0.1}\text{S}_2$   | $\text{Cu}_{1.098(3)}\text{Fe}_{0.912(2)}\text{Ge}_{0.094(2)}\text{S}_2$ |

\*Normalized to 2 sulfur atoms per formula unit in  $\text{CuFeS}_2$ .

<sup>#</sup>Due to the overlap of the  $K_\alpha$  and  $L_\alpha$  characteristic lines of Cu and Fe, there may be uncertainties in the quantitative at.% determined by EDS.

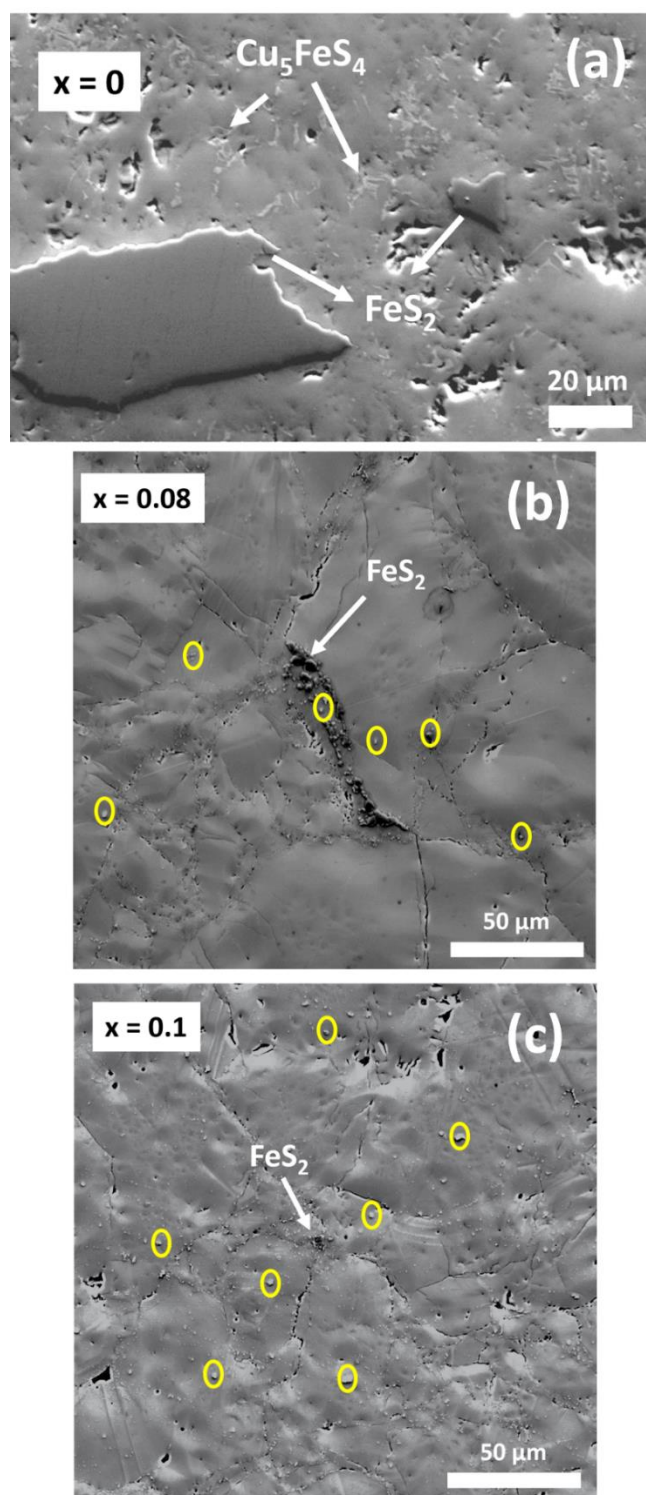

**Figure S2.** SEM images of  $\text{CuFe}_{1-x}\text{Ge}_x\text{S}_2$  ( $x = 0, 0.08$  and  $0.1$ ) showing the presence of trace amounts of secondary phases. Substituted samples with higher Ge content ( $x \geq 0.08$ ) contain another chalcopyrite-like phase (yellow circles) identified from EDS as  $\text{Cu}_{21.69}\text{Fe}_{25.74}\text{Ge}_{0.94}\text{S}_{51.64}$  and  $\text{Cu}_{21.91}\text{Fe}_{25.46}\text{Ge}_{1.83}\text{S}_{50.79}$  in materials with compositions  $x = 0.08$  and  $0.1$ , respectively.

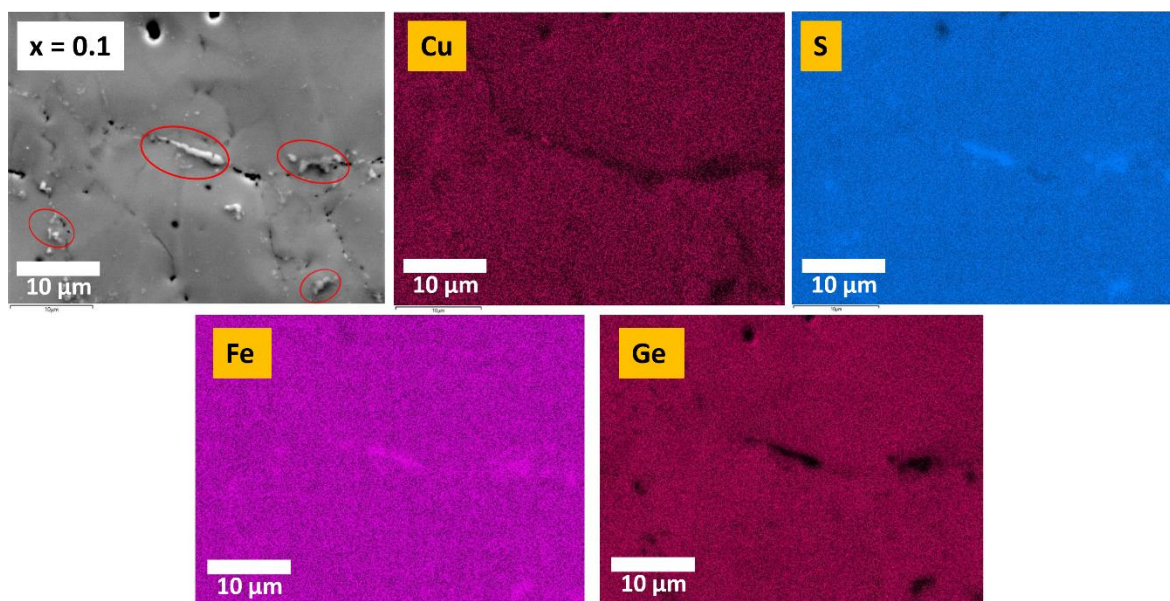

**Figure S3.** SEM-EDS elemental mapping of  $\text{CuFe}_{0.9}\text{Ge}_{0.1}\text{S}_2$  showing the presence of copper-poor chalcopyrite-like secondary phase.

**Table S3.** XPS binding energies and corresponding oxidation states of individual elements in Ge-substituted  $\text{CuFe}_{0.94}\text{Ge}_{0.06}\text{S}_2$ .

| Element | Peak              | B.E.(eV)* | Oxidation state |
|---------|-------------------|-----------|-----------------|
| Cu      | 2p <sub>3/2</sub> | 932.3     | +1              |
|         | 2p <sub>1/2</sub> | 952.1     | +1              |
| Fe      | 2p <sub>3/2</sub> | 710.2     | +3              |
|         | 2p <sub>1/2</sub> | 723.7     | +3              |
|         | 2p                | 707.9     | +2              |
| S       | 2p <sub>3/2</sub> | 161.4     | -2              |
|         | 2p <sub>1/2</sub> | 162.6     | -2              |
| Ge      | 3d <sub>5/2</sub> | 31.2      | +4              |
|         | 3d <sub>3/2</sub> | 31.8      | +4              |
|         | 3d <sub>5/2</sub> | 30.5      | +2              |
|         | 3d <sub>3/2</sub> | 31.1      | +2              |

\*The binding energy of the XPS peaks is assigned on the basis of data in the literature<sup>1-5</sup> and in the NIST database.<sup>6</sup>

**Table S4.** Hall coefficient data for  $\text{CuFe}_{1-x}\text{Ge}_x\text{S}_2$  ( $0 \leq x \leq 0.1$ ) at room temperature.

| Sample                                         | Charge carrier concentration<br>( $\times 10^{19} \text{ cm}^{-3}$ ) | Charge carrier<br>mobility ( $\text{cm}^2 \text{ V}^{-1} \text{ s}^{-1}$ ) |
|------------------------------------------------|----------------------------------------------------------------------|----------------------------------------------------------------------------|
| $\text{CuFeS}_2$                               | 1.4(2)                                                               | 15(3)                                                                      |
| $\text{CuFe}_{0.98}\text{Ge}_{0.02}\text{S}_2$ | 2.3(2)                                                               | 11(1)                                                                      |
| $\text{CuFe}_{0.96}\text{Ge}_{0.04}\text{S}_2$ | 3.1(3)                                                               | 9(2)                                                                       |
| $\text{CuFe}_{0.94}\text{Ge}_{0.06}\text{S}_2$ | 4.7(3)                                                               | 8(2)                                                                       |
| $\text{CuFe}_{0.92}\text{Ge}_{0.08}\text{S}_2$ | 2.8(4)                                                               | 11(1)                                                                      |
| $\text{CuFe}_{0.9}\text{Ge}_{0.1}\text{S}_2$   | 1.9(2)                                                               | 15(2)                                                                      |

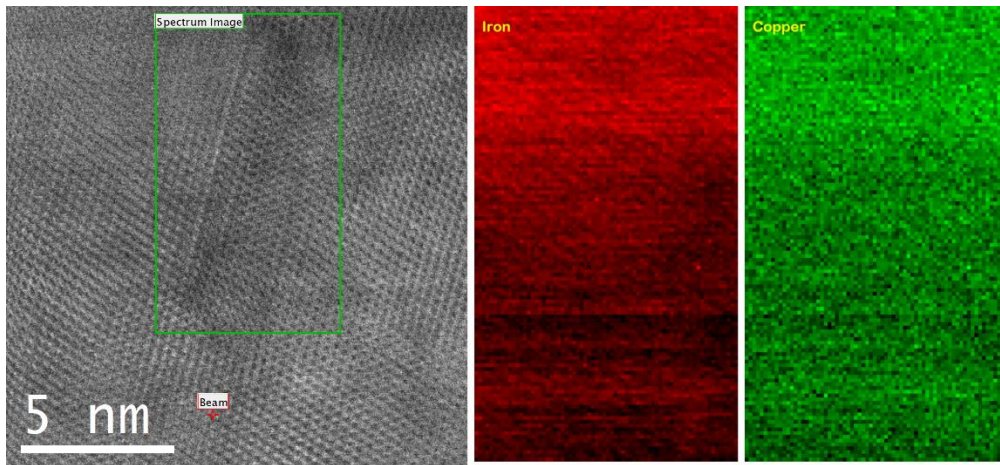

**Figure S4.** STEM image illustrating the chemical homogeneity of the cations in the defect regions in  $\text{CuFe}_{0.94}\text{Ge}_{0.06}\text{S}_2$ .

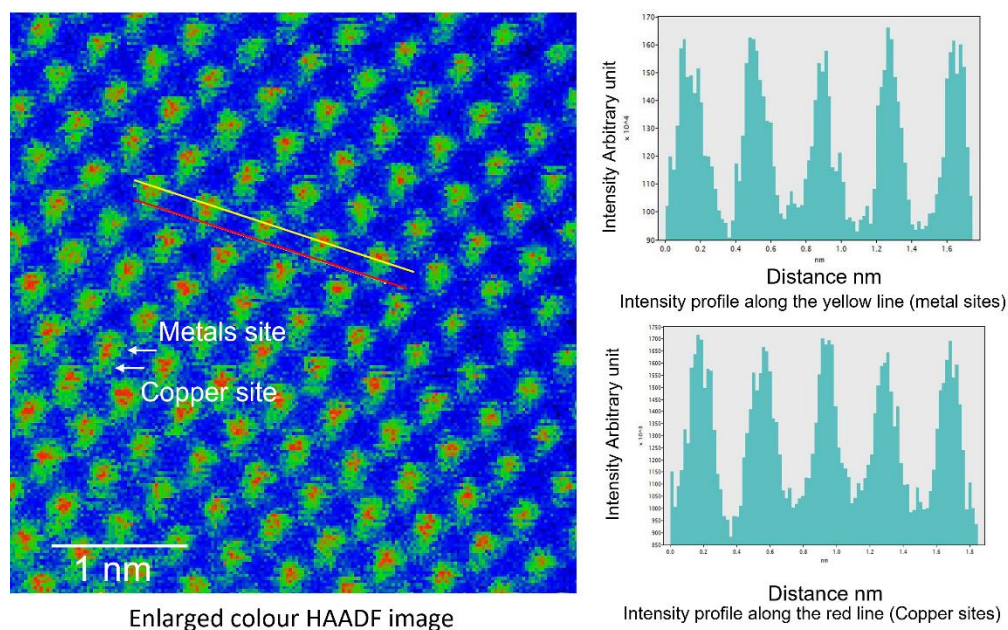

**Figure S5.** Enlarged HAADF-STEM image showing the uniform distribution of cations in  $\text{CuFe}_{0.94}\text{Ge}_{0.06}\text{S}_2$ .

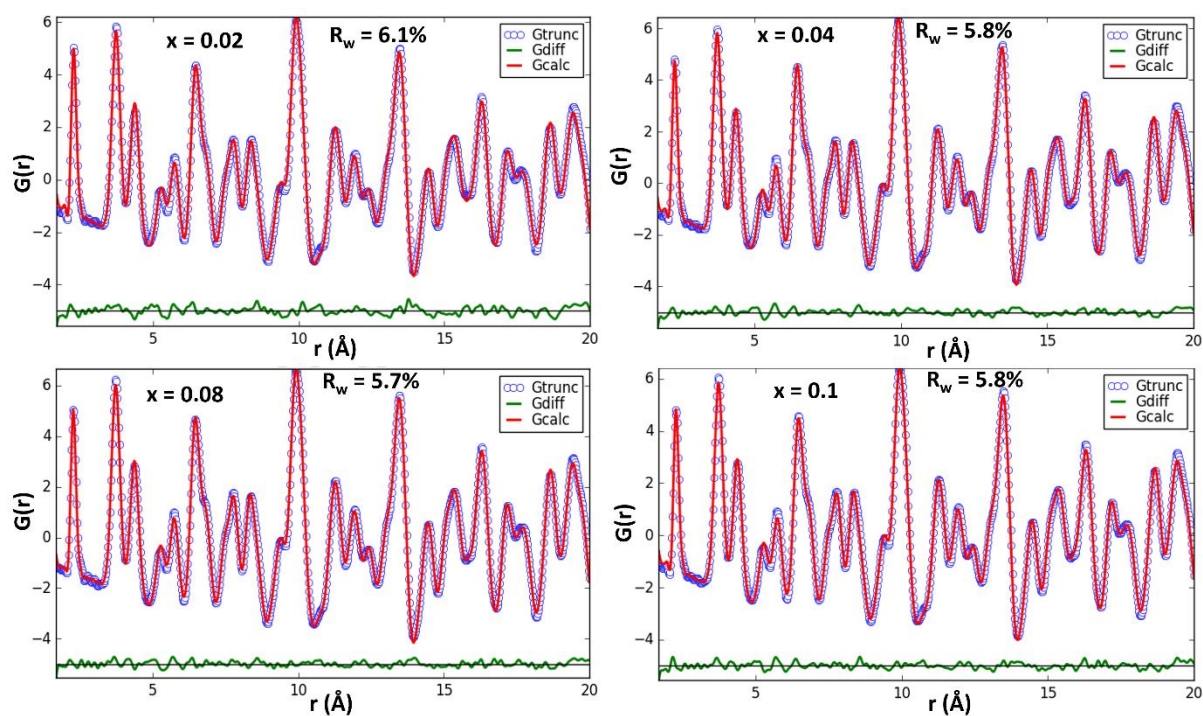

**Figure S6.** Experimental, calculated and difference pair distribution function,  $G(r)$  as a function of atomic-pair distance ( $r$ ) for  $\text{CuFe}_{1-x}\text{Ge}_x\text{S}_2$  ( $0.02 \leq x \leq 0.1$ ).

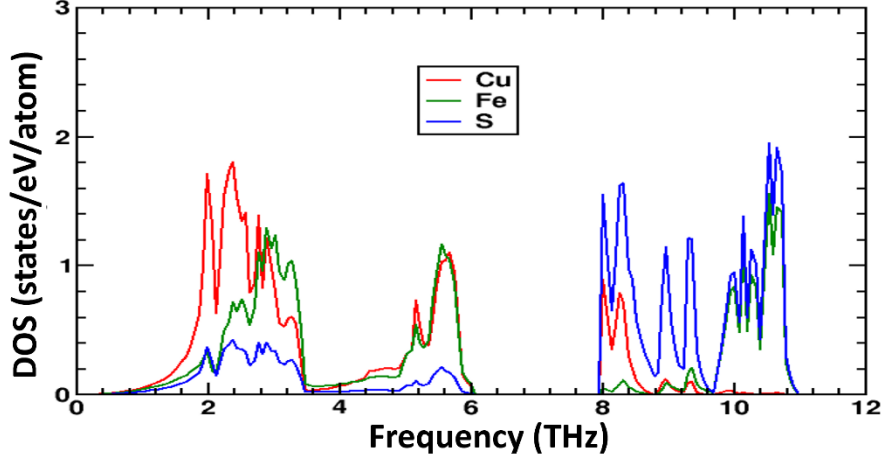

**Figure S7.** Phonon density of states (DOS) of CuFeS<sub>2</sub>.

**Table S5.** Phonon group velocities of the LA, LA' and TO modes in CuFeS<sub>2</sub> and in CuFeS<sub>2</sub> with 6.25 at.% of Ge substitution.

|       | CuFeS <sub>2</sub> (m s <sup>-1</sup> ) | Ge-substituted CuFeS <sub>2</sub> (m s <sup>-1</sup> ) |
|-------|-----------------------------------------|--------------------------------------------------------|
| Γ – X | 2307, 2911, 5127                        | 2470, 2553, 4723                                       |
| Γ – Z | 2009, 2921, 5271                        | 2300, 2585, 5142                                       |
| Γ – N | 2352, 5354                              | 2597, 4888                                             |

### Calculation Details:

- **Lorenz number and electronic thermal conductivity:**

The electronic part of the thermal conductivity ( $\kappa_e$ ) was calculated from the Wiedemann-Franz relation:

$$\kappa_e = L\sigma T \quad (\text{S1})$$

$L$  is the temperature-dependent Lorenz number and  $T$  is the temperature. The temperature-dependent Lorenz number was evaluated from the following relation:

$$L = \left(\frac{k_B}{e}\right)^2 \left( \frac{\left(\frac{r+7}{2}\right)F_{r+5/2}(\eta)}{\left(\frac{r+3}{2}\right)F_{r+1/2}(\eta)} - \left[ \frac{\left(\frac{r+5}{2}\right)F_{r+3/2}(\eta)}{\left(\frac{r+3}{2}\right)F_{r+1/2}(\eta)} \right]^2 \right) \quad (\text{S2})$$



Where  $k_B$  is the Boltzmann's constant,  $\eta$  is the reduced Fermi energy that is obtained from Seebeck coefficient values via the relation:

$$S = \pm \frac{k_B}{e} \left( \frac{\left(\frac{r+5}{2}\right) F_{r+3/2}(\eta)}{\left(\frac{r+3}{2}\right) F_{r+1/2}(\eta)} - \eta \right) \quad (\text{S3})$$

Here,  $F(\eta)$  is the reduced Fermi integral given by:

$$F_n(\eta) = \int_0^\infty \frac{x^n}{1+e^{x-\eta}} dx \quad (\text{S4})$$

And  $\eta = E_F/k_B T$  where  $E_F$  denotes the Fermi level. Assuming that the main scattering mechanism is acoustic phonon scattering, the value of  $r$  is taken as  $-1/2$ . The Lorenz number at each temperature value is therefore obtained by substituting  $\eta$  and  $r$  in equation (S2).

- **Mean sound velocity ( $v_m$ ):**

$$v_m = \left[ \frac{1}{3} \left( \frac{2}{v_t^3} + \frac{1}{v_l^3} \right) \right]^{-\frac{1}{3}}$$

- and **average sound velocity ( $v_{\text{avg}}$ ):**

$$v_{\text{avg}} = (2v_t + v_l)/3$$

where,  $v_l$  and  $v_t$  are the longitudinal and transverse sound velocities, respectively.

- **Shear modulus ( $G$ ):**

$$G = d v_t^2$$

Where  $d$  and  $v_t$  are the density and transverse velocities respectively.

- **Young's modulus ( $E$ ):**

$$E = \frac{d v_t^2 (3v_l^2 - 4v_t^2)}{(v_l^2 - v_t^2)}$$

- **Debye temperature ( $\theta_D$ ):**

$$\theta_D = \frac{h}{k_B} \left( \frac{3N}{4\pi V} \right)^{1/3} v_m$$

where  $h$  is the Plank's constant,  $k_B$  is the Boltzmann's constant,  $N$  is the number of atoms in the unit cell,  $V$  is the volume of the unit cell and  $v_m$  is the mean sound velocity.

- **Distortion Parameters:**

Bond distortion parameter:

$$\gamma_x = \frac{1}{4} \sum_{i=1}^4 \left[ \frac{\langle x_i \rangle - x_i}{\langle x_i \rangle} \right]^2$$

where  $\langle x_i \rangle$  and  $x_i$  denote the mean and individual Ge-S bond lengths in the GeS<sub>4</sub> tetrahedra.

Angle distortion parameter:

$$\gamma_\theta = \frac{1}{6} \sum_{i=1}^6 \left[ \frac{\langle \theta_i \rangle - \theta_i}{\langle \theta_i \rangle} \right]^2$$

where  $\langle \theta_i \rangle$  and  $\theta_i$  denote the mean and individual S-Ge-S bond angles in the GeS<sub>4</sub> tetrahedra.

- **Scattering Parameters:**

The point defect parameter ( $A$ ) can be written as:

$$A = \frac{\Omega_o}{4\pi v_m^3} \Gamma$$

where,  $\Omega_o$  is volume of the primitive unit cell, and  $\Gamma = \Gamma_M$  (mass-difference fluctuation) +  $\Gamma_S$  (strain-field fluctuation) given by:

$$\Gamma_M = \frac{\sum_{i=1}^n c_i \left(\frac{M_i}{M}\right)^2 f_i^2 f_i^2 \left(\frac{M_i^1 - M_i^2}{M_i}\right)^2}{\sum_{i=1}^n c_i}$$

and,

$$\Gamma_S = \frac{\sum_{i=1}^n c_i \left(\frac{M_i}{M}\right)^2 f_i^2 f_i^2 \varepsilon \left(\frac{r_i^1 - r_i^2}{r_i}\right)^2}{\sum_{i=1}^n c_i}$$

where,  $\overline{M}_l = \sum_k f_i^k M_i^k$  ;  $\overline{r}_l = \sum_k f_i^k r_i^k$  ;  $\overline{M} = \frac{\sum_{i=1}^n c_i \overline{M}_l}{\sum_{i=1}^n c_i}$ . Here  $n$  is the number of crystallographic sub-lattices which is 3 for CuFeS<sub>2</sub> and  $c_i$  is the degeneracy of each site in the primitive unit cell ( $c_1 = c_2 = 1$ ,  $c_3 = 2$  corresponding to Cu, Fe and S sites respectively).  $\overline{M}_l$  and  $\overline{r}_l$  denote the average mass and radius of the atoms on the  $l^{\text{th}}$  sublattice, respectively.  $M_i^k$  and  $f_i^k$  are the atomic mass and fractional occupation of the  $k^{\text{th}}$  atom on the  $i^{\text{th}}$  sublattice, respectively.  $\overline{M}$  is the total average atomic mass of the compound.  $\varepsilon$  is a phenomenological adjustable parameter that was evaluated from fitting Equation 1 to the experimental  $\kappa_L$ . For CuFe<sub>1-x</sub>Ge<sub>x</sub>S<sub>2</sub> samples, on the basis of germanium substitution occurring at the iron site, the total scattering parameter can be, thus, written as:

$$\Gamma = \frac{1}{4} \left( \frac{\overline{M}_{Fe}}{\overline{M}} \right)^2 x(1-x) \left[ \left( \frac{M_{Fe}^{Fe} - M_{Fe}^{Ge}}{\overline{M}_{Fe}} \right)^2 + \varepsilon \left( \frac{r_{Fe}^{Fe} - r_{Fe}^{Ge}}{\overline{r}_{Fe}} \right)^2 \right]$$

#### References:

1. H. Xie, X. Su, G. Zheng, T. Zhu, K. Yin, Y. Yan, C. Uher, M. G. Kanatzidis and X. Tang, *Adv. Energy Mater.*, 2017, **7**, 1601299.
2. H. Xie, X. Su, S. Hao, C. Zhang, Z. Zhang, W. Liu, Y. Yan, C. Wolverton, X. Tang and M. G. Kanatzidis, *J. Am. Chem. Soc.*, 2019, **141**, 18900–18909.
3. S. Tippireddy, F. Azough, F. T. Tompkins, A. Bhui, R. Freer, R. Grau-crespo, K. Biswas, P. Vaqueiro and A. V Powell, *Chem. Mater.*, 2022, **34**, 5860–5873.
4. I. Nakai, Y. Sugitani, K. Nagashima and Y. Niwa, *J. Inorg. Nucl. Chem.*, 1978, **40**, 789–791.
5. A. Ghahremaninezhad, D. G. Dixon and E. Asselin, *Electrochim. Acta*, 2013, **87**, 97–112.
6. NIST X-ray Photoelectron Spectroscopy Database, Version 4.1 (National Institute of Standards and Technology, Gaithersburg, 2012); <http://srdata.nist.gov/xps/>.
